# Supplementary material for: Toughened chitosan-based composite membranes with antibiofouling and antibacterial properties via incorporation of benzalkonium chloride
Source: Royal Society of Chemistry journal article supplement (doi:10.1039/d1ra01830b), 2021-01-01
Supplement: d1ra01830b1.pdf [file d1ra01830b1.pdf]

## Supporting Information

### Toughened chitosan-based composite membranes with antibiofouling and antibacterial properties via incorporation of benzalkonium chloride

Fitri Khoerunnisa<sup>a\*</sup>, Chintia Kulsum, Fitri Dara<sup>b</sup>, Mita Nurhayati<sup>a</sup>, Nisa Nashrah<sup>c</sup>, Siti Fatimah<sup>c</sup>, Amelinda Pratiwi<sup>a</sup>, Hendrawan<sup>a</sup>, Muhamad Nasir<sup>b</sup>, Young Gun Ko<sup>c</sup>, Eng-Poh Ng<sup>d</sup>, Pakorn Opaprakasit<sup>e\*</sup>

<sup>a</sup> Department of Chemistry, Indonesia University of Education, Setiabudhi 229, Bandung 40154, Indonesia.

<sup>b</sup> Research Unit for Clean Technology, Indonesian Institute of Science, Bandung 40135, Indonesia

<sup>c</sup> School of Material Science & Engineering, Yeungnam University, Gyeongsan 38541, South Korea.

<sup>d</sup> School of Chemical Sciences, Universiti Sains Malaysia, 11800 USM, Penang, Malaysia.

<sup>e</sup> School of Bio-Chemical Engineering and Technology, Sirindhorn International Institute of Technology (SIIT), Thammasat University, Pathum Thani 12121, Thailand

\*Corresponding authors. E-mail: [fitri@upi.edu](mailto:fitri@upi.edu) (FK); [pakorn@siit.tu.ac.th](mailto:pakorn@siit.tu.ac.th) (PO)

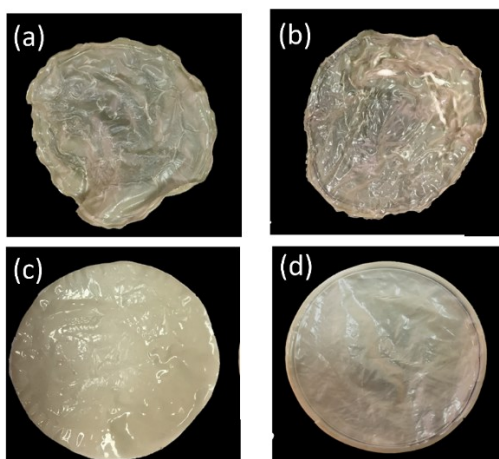

Fig. S1. Physical appearances of dried membranes of (a) M-0 and (b) MB-120; wet membranes of (c) M-0 and (d) MB-120

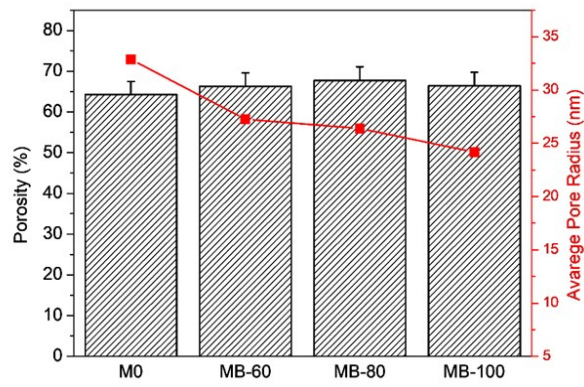

**Fig. S2.** Porosity and average pore radius of chitosan/PEG/MWCNT/BKC

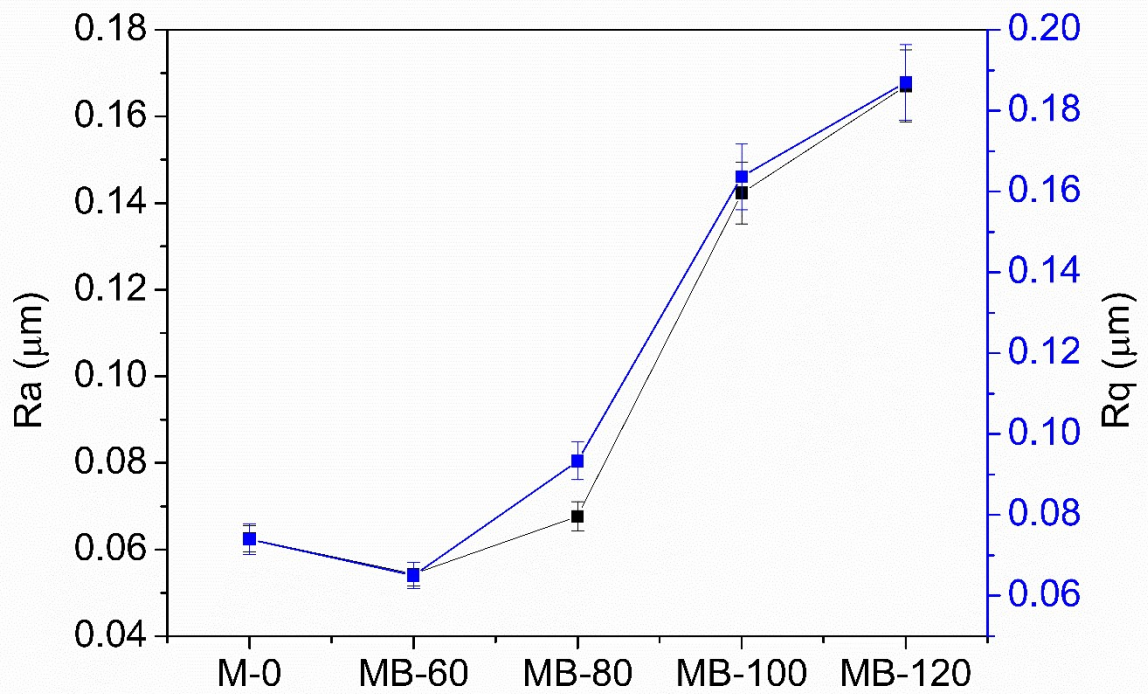

**Fig. S3.** The Ra and Rq values of composite membranes containing different BKC contents.

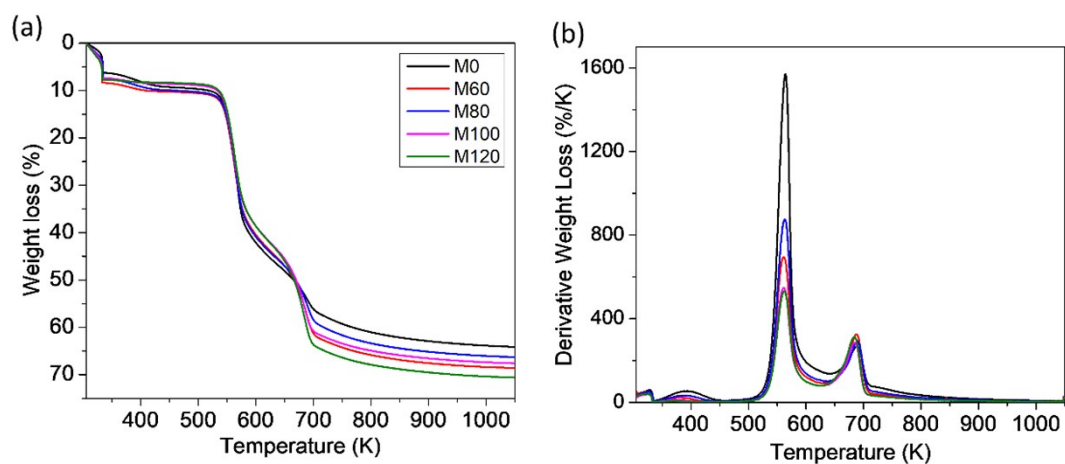

**Fig. S4.** Thermal stability of composite membranes (a) and derivative weight loss from thermogravimetric analysis (b)

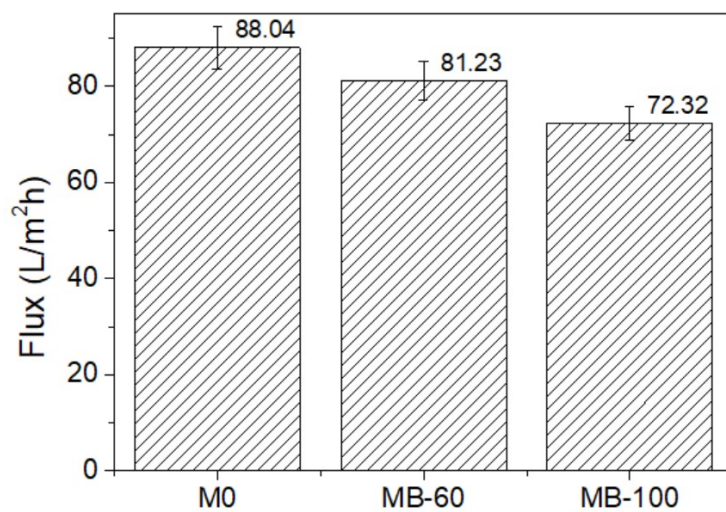

**Fig. S5.** Average water flux of the composite membranes containing different BKC contents after a year of storage.

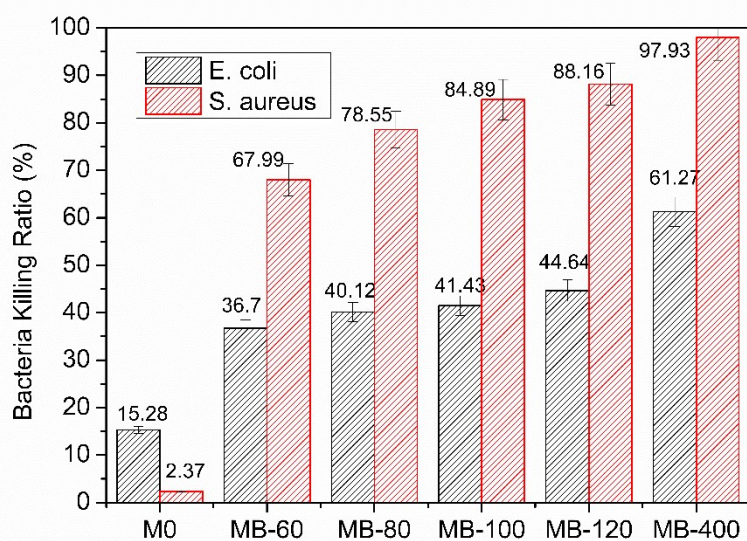

**Fig. S6.** The bacteria-killing ratio of the composite membranes containing different BKC contents after a year of storage.

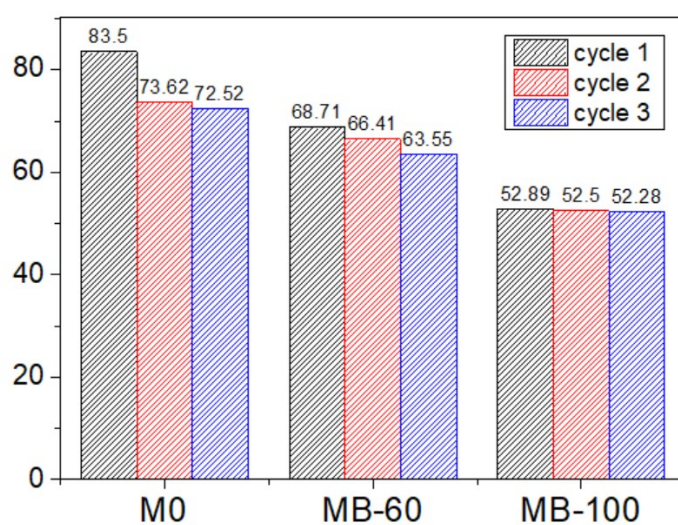

**Fig. S7.** Average water flux of the composite membranes containing different BKC contents for up to 3 cycles of operation.

**Table S1.** Thermal stability of composite membranes

| Composite membrane | Parameter       |         |         |                                       |                    |
|--------------------|-----------------|---------|---------|---------------------------------------|--------------------|
|                    | Weight loss (%) |         |         | Maximum decomposition temperature (K) | Final residual (%) |
|                    | Phase 1         | Phase 2 | Phase 3 |                                       |                    |
|                    |                 |         |         |                                       |                    |

---

|               |      |      |     |     |      |
|---------------|------|------|-----|-----|------|
| <b>M0</b>     | 10.3 | 45.7 | 8.1 | 564 | 35.9 |
| <b>MB-60</b>  | 11.2 | 50.8 | 6.6 | 561 | 31.4 |
| <b>MB-80</b>  | 11   | 47.6 | 7.7 | 563 | 33.7 |
| <b>MB-100</b> | 9.5  | 51.5 | 6.6 | 561 | 32.4 |
| <b>MB-120</b> | 9.2  | 54.5 | 6.9 | 561 | 29.4 |

---
